# Supplementary material
Source: publisher site journal article supplement (https://www.dovepress.com/article/421482)
Supplement: Supplementary file 1 [file get_supplementary_file.php]

**Appendix 1**

**Examples of risk decision tasks**

the relationship domain:

| Situation 1 | You meet a girl in a public class. Although you have only spoken to her once, you have a crush on her. You want to invite her to dinner or a movie, but she might say no. So you must choose: |
| --- | --- |
| 1. No invitation for now 2. B. Make the invitation immediately |

the money gain domain:

| Situation 2 | You have entered the raffle of a mobile company and won third prize. The prize is a prepaid phone card. Now you can choose two ways to pay for the prize. One is to get a 50¥ card directly. The other is to flip a coin and get a 100¥ card for heads and nothing for tails. Then you must choose: |
| --- | --- |
| A. Get a 50 ¥ prepaid card directly  B. Coin toss, 50% chance of getting a 100 ¥ prepaid card, 50% chance of getting nothing |

the money loss domain:

| Situation 3 | You went into partnership with your friend, invested some money, and opened a snack bar. Now the shop is doing so poorly that it has lost some money. You can sell the shop now to avoid further losses. You can keep the store going, possibly losing more money, possibly making it back. Then you must choose: |
| --- | --- |
| A. Keep it going, 50% chance of losing $4,000, 50% chance of not losing  B. Transfer immediately, determine the loss of 2000 yuan |

the personal safety domain:

| Situation 4 | You have recently had some health problems (ulcers, sore dry throat, etc.). The doctor gave you a prescription and asked you to avoid foods, such as seafood and spicy food; otherwise it will affect the efficacy of the prescription. However, it has been a while since you have eaten these types of food, and you want to eat them. Then you must choose: |
| --- | --- |
| A. Eat the prohibited food  B. Do not eat the prohibited food |
